# Supplementary material
Source: Springer Nature journal article supplement (https://www.springermedizin.de/resource/supplementary/12889_2001_22_MOESM1_ESM.pdf/9500178)

**Figure 1.** Stratified analysis of children who did and did not attend school and presence of *Giardia* cysts in stool samples from children living in temporary housing after the 1999 earthquake disaster in Armenia.

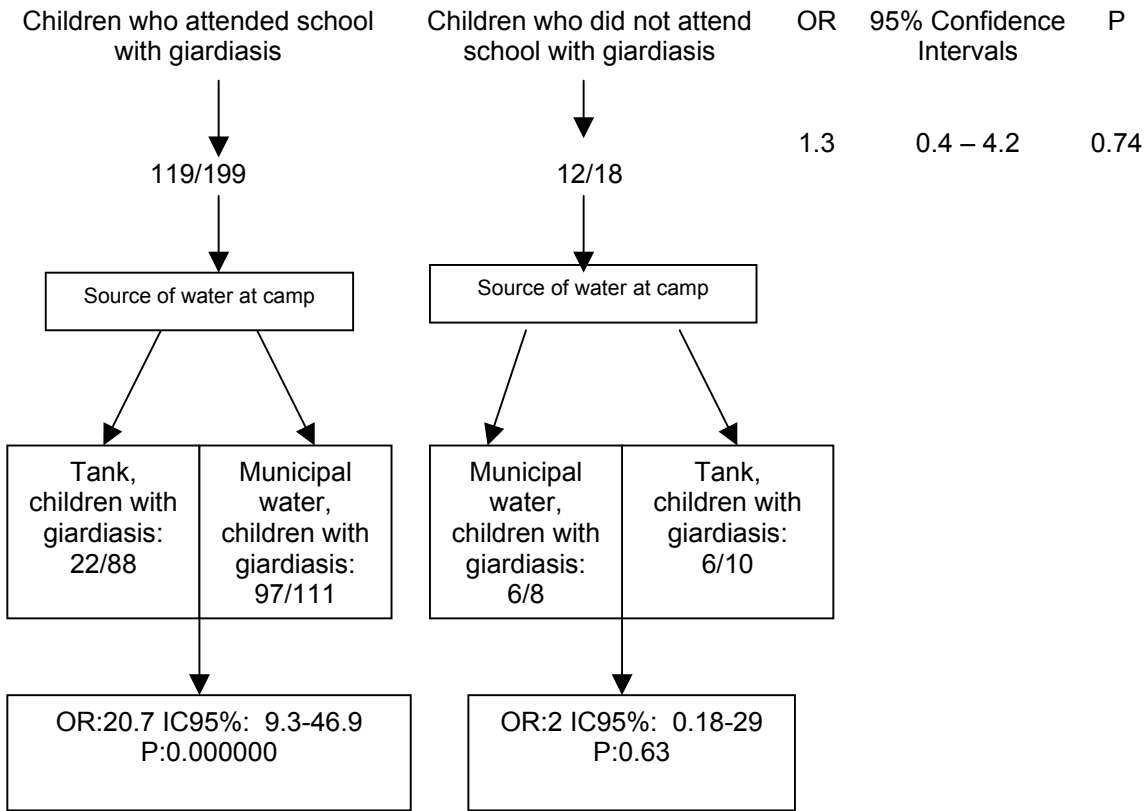

Supplement: MOESM1 [file 9500178]
